# Supplementary material for: Knockout driven fragmentation of porphyrins
Source: Royal Society of Chemistry journal article supplement (doi:10.1039/c7cp01583f), 2017-01-01
Supplement: c7cp01583f1.pdf [file c7cp01583f1.pdf]

## Supplementary Materials for: Knockout driven fragmentation of porphyrins

LINDA GIACOMOZZI, MICHAEL GATCHELL, NATHALIE DE RUETTE,  
MICHAEL WOLF, GIOVANNA D'ANGELO, HENNING T. SCHMIDT,  
HENRIK CEDERQUIST AND HENNING ZETTERGREN  
*Department of Physics, Stockholm University, Stockholm, SE-106 91,  
Sweden, E-mail: linda.giacomozzi@fysik.su.se*

### Dissociation Energies for protonated Tetraphenylporphyrin (TPP+H)

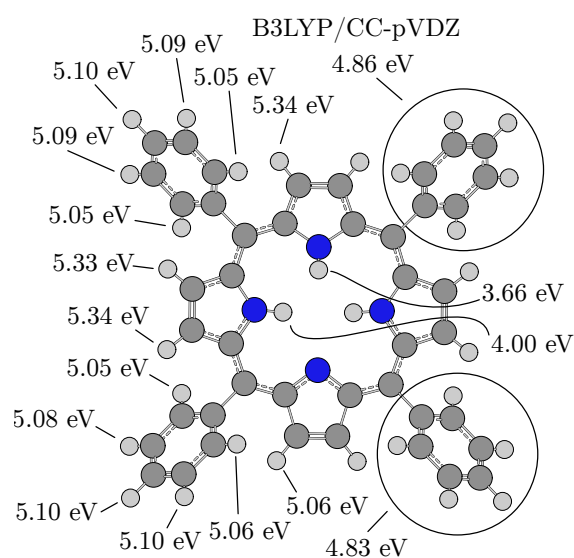

Figure S 1: Dissociation energies for the phenyl groups and different hydrogen positions for protonated Tetraphenylporphyrin (TPP + H)<sup>+</sup> molecule, calculated by using Density Function Theory (DFT) at the B3LYP/CC-pVDZ level of theory.

## Dissociation Energies for Tetraphenylporhyrin iron (III) (FeTPP)

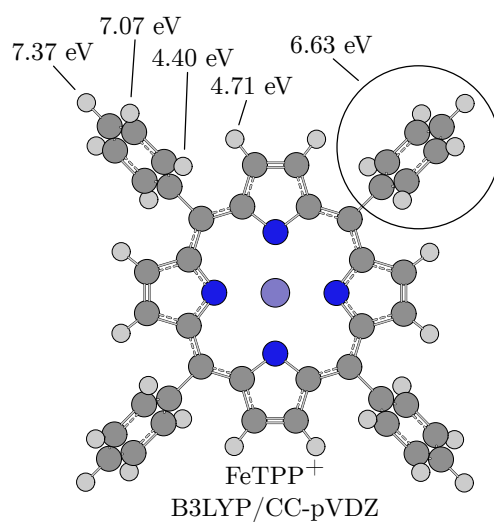

Figure S 2: Dissociation energies for the phenyl groups and different hydrogen positions for Tetraphenylporhyrin iron (III) (FeTPP) molecule, calculated by using Density Function Theory (DFT) at the B3LYP/CC-pVDZ level of theory.
